# Supplementary material for: Risk Factors Associated with the Development of Hospital-Acquired Infections in Hospitalized Patients with Severe COVID-19
Source: MDPI journal article supplement (doi:10.3390/antibiotics12071108), 2023-06-27
Supplement: s1 [file s1]

## Supplementary material

# Risk Factors Associated with the Development of Hospital-Acquired Infections in Hospitalized Patients with Severe COVID-19

Fernando Solís-Huerta <sup>1,†</sup>, Bernardo Alfonso Martínez-Guerra <sup>2\*,†</sup>, Carla Marina Roman-Montes <sup>2</sup>, Karla Maria Tamez-Torres <sup>2</sup>, Sandra Rajme-Lopez <sup>2</sup>, Narciso Ortiz-Conchi <sup>3</sup>, Norma Irene López-García <sup>3</sup>, Guadalupe Yvonne Villalobos-Zapata <sup>3</sup>, Andrea Rangel-Cordero <sup>3</sup>, Janet Santiago-Cruz <sup>3</sup>, Luis Fernando Xancal-Salvador <sup>3</sup>, Steven Méndez-Ramos <sup>3</sup>, Eric Ochoa-Hein <sup>4</sup>, Arturo Galindo-Fraga <sup>4</sup>, Alfredo Ponce-de-Leon <sup>2</sup>, Maria Fernanda Gonzalez-Lara <sup>3</sup> and Jose Sifuentes-Osornio <sup>5,\*</sup>

<sup>1</sup> Instituto Nacional de Ciencias Médicas y Nutrición Salvador Zubirán, Department of Medicine, Mexico City 14080, Mexico; fernando.solish@incmnsz.mx (F.S.-H)

<sup>2</sup> Instituto Nacional de Ciencias Médicas y Nutrición Salvador Zubirán, Department of Infectious Diseases, Mexico City 14080, Mexico; carla.romanm@incmnsz.mx (C.M.R.-M.); karla.tamezt@incmnsz.mx (K.M.T.-T.); sandra.rajmel@incmnsz.mx (S.R.-L.); luis.ponceg@incmnsz.mx (A.P.-d.-L.)

<sup>3</sup> Instituto Nacional de Ciencias Médicas y Nutrición Salvador Zubirán, Department of Infectious Diseases, Clinical Microbiology Laboratory, Mexico City 14080, Mexico; narciso.ortizc@incmnsz.mx (N.O.-C.); irene.lopezg@incmnsz.mx (N.I.L.-G.); yvonne.villalobosz@incmnsz.mx (G.Y.V.-Z.); andrea.rangelc@incmnsz.mx (A.R.-C.); janet.santiagoc@incmnsz.mx (J.S.-C.); fernando.xancals@incmnsz.mx (L.F.X.-S.); steven.mendezr@incmnsz.mx (S.M.-R.); fernanda.gonzalezl@incmnsz.mx (M.F.G.-L.)

<sup>4</sup> Instituto Nacional de Ciencias Médicas y Nutrición Salvador Zubirán, Hospital Epidemiology Department, Mexico City 14080, Mexico; eric.ochoah@incmnsz.mx (E.O.-H.); arturo.galindof@incmnsz.mx (A.G.-F.)

<sup>5</sup> Instituto Nacional de Ciencias Médicas y Nutrición Salvador Zubirán, General Direction, Mexico City 14080, Mexico

† These authors contributed equally to this work.

\* Correspondence: bernardo.martinezg@incmnsz.mx (B.A.M.-G.);

jose.sifuentesos@incmnsz.mx (J.S.-O.);

Tel.: +52-55-54-87-09-00 (ext. 5860) (B.A.M.-G.); +52-55-54-87-09-00 (ext. 6904) (J.S.-O.)

**Table S1.** Bacterial isolates

| Infection                                                                                   | Microorganism                                    |
|---------------------------------------------------------------------------------------------|--------------------------------------------------|
| Hospital-acquired pneumonia/Ventilator-associated pneumonia<br>250 isolates in 173 episodes | <i>Enterobacter</i> complex<br>n=49              |
|                                                                                             | <i>Pseudomonas aeruginosa</i><br>n=35            |
|                                                                                             | <i>Staphylococcus aureus</i><br>n=32             |
|                                                                                             | <i>Escherichia coli</i><br>n=29                  |
|                                                                                             | <i>Klebsiella pneumoniae</i><br>n=26             |
|                                                                                             | <i>Klebsiella oxytoca</i><br>n=25                |
|                                                                                             | <i>Pseudomonas spp</i><br>n=8                    |
|                                                                                             | <i>Stenotrophomonas maltophilia</i><br>n=8       |
|                                                                                             | <i>Klebsiella aerogenes</i><br>n=5               |
|                                                                                             | <i>Serratia marcescens</i><br>n=5                |
|                                                                                             | <i>Acinetobacter spp</i><br>n=5                  |
|                                                                                             | <i>Streptococcus pneumoniae</i><br>n=5           |
|                                                                                             | <i>Streptococcus spp</i><br>n=5                  |
|                                                                                             | <i>Klebsiella variicola</i><br>n=3               |
|                                                                                             | <i>Citrobacter spp</i><br>n=3                    |
|                                                                                             | <i>Haemophilus influenzae</i><br>n=2             |
|                                                                                             | <i>Proteus spp</i><br>n=2                        |
|                                                                                             | <i>Burkholderia spp</i><br>n=2                   |
|                                                                                             | <i>Morganella morganii</i><br>n=1                |
|                                                                                             | <i>Raoutella spp</i><br>n=1                      |
|                                                                                             | <i>Enterococcus spp</i><br>n=1                   |
| Primary bloodstream infections<br>66 isolates in 66 episodes                                | Coagulase-negative <i>Staphylococcus</i><br>n=26 |
|                                                                                             | <i>Enterococcus spp</i><br>n=12                  |
|                                                                                             | <i>Enterobacter</i> complex<br>n=9               |
|                                                                                             | <i>Streptococcus spp</i><br>n=5                  |
|                                                                                             | <i>Staphylococcus aureus</i><br>n=3              |
|                                                                                             | <i>Escherichia coli</i><br>n=3                   |
|                                                                                             | <i>Klebsiella oxytoca</i><br>n=2                 |
|                                                                                             | <i>Klebsiella aerogenes</i>                      |

|                                                                               |                                     |
|-------------------------------------------------------------------------------|-------------------------------------|
|                                                                               | n=2                                 |
|                                                                               | <i>Pseudomonas aeruginosa</i>       |
|                                                                               | n=2                                 |
|                                                                               | <i>Pseudomonas spp</i>              |
|                                                                               | n=1                                 |
|                                                                               | <i>Klebsiella pneumoniae</i>        |
|                                                                               | n=1                                 |
| Bone, joint and skin and soft tissues infections<br>11 isolates in 4 episodes | <i>Stenotrophomonas maltophilia</i> |
|                                                                               | n=1                                 |
|                                                                               | <i>Mycobacterium chelonae</i>       |
|                                                                               | n=1                                 |
|                                                                               | <i>Escherichia coli</i>             |
|                                                                               | n=3                                 |
|                                                                               | <i>Enterococcus spp</i>             |
| Abdominal infections<br>3 isolates in 1 episode                               | n=3                                 |
|                                                                               | <i>Morganella morganii</i>          |
|                                                                               | n=2                                 |
|                                                                               | <i>Enterobacter complex</i>         |
|                                                                               | n=1                                 |
|                                                                               | <i>Klebsiella pneumoniae</i>        |
|                                                                               | n=1                                 |
| Urinary tract infection<br>2 isolates in 2 episodes                           | <i>Pseudomonas aeruginosa</i>       |
|                                                                               | n=1                                 |
|                                                                               | <i>Escherichia coli</i>             |
| <i>Clostridioides difficile</i> diarrhea<br>1 episode                         | n=1                                 |
|                                                                               | <i>Enterococcus faecalis</i>        |
|                                                                               | n=1                                 |
|                                                                               | <i>Pseudomonas aeruginosa</i>       |
|                                                                               | n=1                                 |
|                                                                               | <i>Escherichia coli</i>             |
|                                                                               | n=2                                 |
|                                                                               | NA                                  |

**Table S2.** Fungal isolates

| <b>Infection</b>                                                                          | <b>Microorganism</b>                         |
|-------------------------------------------------------------------------------------------|----------------------------------------------|
| Probable/proven COVID-19 associated pulmonary aspergillosis<br>28 isolates in 29 episodes | <i>Aspergillus fumigatus</i><br>n=11         |
|                                                                                           | <i>Aspergillus spp</i><br>n=6                |
|                                                                                           | <i>Aspergillus niger</i><br>n=5              |
|                                                                                           | <i>Aspergillus flavus</i><br>n=4             |
|                                                                                           | <i>Aspergillus lentulus</i><br>n=1           |
|                                                                                           | <i>Aspergillus terreus</i><br>n=1            |
|                                                                                           | Positive <i>Galactomannan</i> antigen<br>n=2 |
| Candidemia<br>23 isolates in 17 episodes                                                  | <i>Candida parapsilosis</i><br>n=12          |
|                                                                                           | <i>Candida albicans</i><br>n=9               |
|                                                                                           | <i>Candida tropicalis</i><br>n=1             |
|                                                                                           | <i>Candida glabrata</i><br>n=1               |
| Mucormycosis<br>6 isolates in 3 episodes                                                  | <i>Mucor spp</i><br>n=4                      |
|                                                                                           | <i>Rhizopus spp</i><br>n=1                   |
|                                                                                           | <i>Conidiobolus</i><br>n=1                   |

**Table S3.** Antimicrobial susceptibility

| <b>Gram negative rods</b>                            | <b>Third generation cephalosporin resistant</b>     | <b>Carbapenem resistant</b>   |
|------------------------------------------------------|-----------------------------------------------------|-------------------------------|
| <i>Enterobacter</i> complex<br>n=62                  | 62                                                  | 0                             |
| <i>Escherichia coli</i><br>n=46                      | 23                                                  | 4                             |
| <i>Klebsiella pneumoniae</i><br>n=31                 | 7                                                   | 0                             |
| <i>Klebsiella oxytoca</i><br>n=27                    | 1                                                   | 0                             |
| <i>Klebsiella aerogenes</i><br>n=7                   | 7                                                   | 0                             |
| <b>Non fermentative Gram-negative rods</b>           | <b>Piperacillin tazobactam resistance resistant</b> | <b>Carbapenem resistant</b>   |
| <i>Pseudomonas aeruginosa</i><br>n=40                | 9                                                   | 5                             |
| <i>Acinetobacter spp</i><br>n=5                      | 5                                                   | 0                             |
| <b>Gram positive cocci</b>                           | <b>Methicillin resistant</b>                        | <b>Ampicillin resistant</b>   |
| <i>Staphylococcus aureus</i><br>n=35                 | 5                                                   | -                             |
| Coagulase-negative <i>Staphylococcus spp</i><br>n=26 | 0                                                   | -                             |
| <i>Enterococcus spp</i><br>n=17                      | -                                                   | 0                             |
| <b>Yeasts</b>                                        | <b>Azole resistant</b>                              | <b>Echinocandin resistant</b> |
| <i>Candida spp</i><br>n=23                           | 6                                                   | 0                             |

**Table S4.** Risk-factors associated with the development of hospital acquired infections according to bivariate analysis

|                                                                                                                                                                                                                                                                                 | RR (CI 95%) p                        |
|---------------------------------------------------------------------------------------------------------------------------------------------------------------------------------------------------------------------------------------------------------------------------------|--------------------------------------|
| Male sex                                                                                                                                                                                                                                                                        | <b>1.63 (1.24 -2.15) p=0.0004</b>    |
| Age >60 years                                                                                                                                                                                                                                                                   | 1.13 (0.88-1.45) p=0.3361            |
| Obesity                                                                                                                                                                                                                                                                         | <b>1.49 (1.16-1.90) p=0.0012</b>     |
| Diabetes mellitus                                                                                                                                                                                                                                                               | 1.11 (0.85-1.44) p=0.4385            |
| Hypertension                                                                                                                                                                                                                                                                    | 0.87 (0.67-1.13) p=0.2963            |
| Chronic obstructive pulmonary disease                                                                                                                                                                                                                                           | 0.31 (0.05-2.14) p=0.1861            |
| Immunosuppression                                                                                                                                                                                                                                                               | 1.05 (0.62-1.76) p=0.8610            |
| Cardiovascular disease                                                                                                                                                                                                                                                          | 1.15 (0.70-1.88) p=0.5903            |
| Chronic kidney disease                                                                                                                                                                                                                                                          | 1.10 (0.57-2.10) p=0.7836            |
| Liver cirrhosis                                                                                                                                                                                                                                                                 | 0.63 (0.10-4.10) p=0.6154            |
| Charlson's score >2 points                                                                                                                                                                                                                                                      | 1.02 (0.78-1.32) p=0.8965            |
| Oxygen saturation <90%                                                                                                                                                                                                                                                          | 2.19 (0.93-5.17) p=0.0547            |
| Lymphocyte count, <800 cells/uL                                                                                                                                                                                                                                                 | <b>1.46 (1.12-1.89) p=0.0039</b>     |
| C reactive protein ≥10 mg/dL                                                                                                                                                                                                                                                    | <b>2.93 (2.01-4.27) p&lt;0.0001</b>  |
| Ferritin >500 ng/mL                                                                                                                                                                                                                                                             | <b>2.07 (1.56-2.76) p&lt;0.0001</b>  |
| Lactic dehydrogenase ≥246 U/L                                                                                                                                                                                                                                                   | <b>2.35 (1.42-3.90) p=0.004</b>      |
| D Dimer >500 ng/mL                                                                                                                                                                                                                                                              | <b>1.45 (1.14-1.86) p=0.0030</b>     |
| Use of IMV in the first 24 hours after admission                                                                                                                                                                                                                                | <b>8.29 (6.50-10.57) p&lt;0.0001</b> |
| Empirical antibiotic-therapy                                                                                                                                                                                                                                                    | 1.10 (0.85-1.41) p=0.474             |
| Corticosteroid treatment                                                                                                                                                                                                                                                        | <b>2.10 (1.63-2.71) p&lt;0.0001</b>  |
| Tocilizumab treatment                                                                                                                                                                                                                                                           | <b>1.56 (1.05-2.33) p=0.03542</b>    |
| Enrollment in a clinical trial                                                                                                                                                                                                                                                  | <b>0.51 (0.34-0.75) p=0.004</b>      |
| <i>CI</i> confidence interval, <i>dl</i> deciliter, <i>IMV</i> invasive mechanical ventilation, <i>IQR</i> interquartile range, <i>L</i> liters, <i>mg</i> milligrams, <i>ml</i> milliliter, <i>ng</i> nanograms, <i>RR</i> relative risk, <i>U</i> units, <i>uL</i> microliter |                                      |
